# Supplementary material
Source: PubMed Central journal article supplement (PMC5726792)
Supplement: NIHMS914453-supplement-1.pdf [file NIHMS914453-supplement-1.pdf]

Table S1 Related to Figure 4: Datasets used in this study

|              | Number of genes ( <i>g</i> ) | Number of samples / cells | Title                                                                                                        |
|--------------|------------------------------|---------------------------|--------------------------------------------------------------------------------------------------------------|
| Grun 2015    | 23,630                       | 192                       | Single-Cell mRNA Sequencing Reveals Rare Intestinal Cell Types                                               |
| GTEx         | 14,202*                      | 8,555                     | The Genotype-Tissue Expression (GTEx) pilot analysis: multi-tissue gene regulation in humans                 |
| ImmGen       | 24,922                       | 214                       | Conservation and divergence in the transcriptional programs of the human and mouse immune systems            |
| Tasic 2016   | 24,057                       | 1,809                     | Adult mouse cortical cell taxonomy by single cell transcriptomics                                            |
| Thomsen 2016 | 23,045                       | 45                        | Fixed single-cell transcriptomic characterization of human radial glial diversity                            |
| Zeisel 2015  | 19,972                       | 3,005                     | Single-cell RNA-seq of mouse cerebral cortex                                                                 |
| PerturbSeq   | 11,738                       | 49,234                    | Perturb-Seq: Dissecting Molecular Circuits with Scalable Single-cell RNA Profiling of Pooled Genetic Screens |
| TCGA         | 20,531                       | 10,554                    | The Cancer Genome Atlas                                                                                      |
| TCGA_GBMLGG  | 20,531                       | 696                       | The Cancer Genome Atlas - Glioblastoma and low grade glioma                                                  |
| TCGA_KICH    | 20,531                       | 66                        | The Cancer Genome Atlas - Kidney Chromophobe                                                                 |
| TCGA_READ    | 20,531                       | 95                        | The Cancer Genome Atlas - Rectum adenocarcinoma                                                              |
| TCGA_CESC    | 20,531                       | 306                       | The Cancer Genome Atlas - Cervical squamous cell carcinoma and endocervical adenocarcinoma                   |
| TCGA_PAAD    | 20,531                       | 179                       | The Cancer Genome Atlas - Pancreatic adenocarcinoma                                                          |
| TCGA_THYM    | 20,531                       | 120                       | The Cancer Genome Atlas - Thymoma                                                                            |
| TCGA_PCPG    | 20,531                       | 184                       | The Cancer Genome Atlas - Pheochromocytoma and Paraganglioma                                                 |
| TCGA_BRCA    | 20,531                       | 1,100                     | The Cancer Genome Atlas - Breast invasive carcinoma                                                          |
| TCGA_UCS     | 20,531                       | 57                        | The Cancer Genome Atlas - Uterine Carcinosarcoma                                                             |
| TCGA_KIPAN   | 20,531                       | 891                       | The Cancer Genome Atlas - Pan kidney                                                                         |
| TCGA_THCA    | 20,531                       | 509                       | The Cancer Genome Atlas - Thyroid carcinoma                                                                  |
| TCGA_HNSC    | 20,531                       | 522                       | The Cancer Genome Atlas - Head and Neck squamous cell carcinoma                                              |
| TCGA_ACC     | 20,531                       | 79                        | The Cancer Genome Atlas - Adrenocortical carcinoma                                                           |
| TCGA_TGCT    | 20,531                       | 156                       | The Cancer Genome Atlas - Testicular Germ Cell Tumors                                                        |
| TCGA_LUSC    | 20,531                       | 501                       | The Cancer Genome Atlas - Lung squamous cell carcinoma                                                       |
| TCGA_KIRC    | 20,531                       | 534                       | The Cancer Genome Atlas - Kidney renal clear cell carcinoma                                                  |
| TCGA_BLCA    | 20,531                       | 408                       | The Cancer Genome Atlas - Bladder Urothelial Carcinoma                                                       |
| TCGA_SARC    | 20,531                       | 262                       | The Cancer Genome Atlas - Sarcoma                                                                            |
| TCGA_UVM     | 20,531                       | 80                        | The Cancer Genome Atlas - Uveal Melanoma                                                                     |
| TCGA_CHOL    | 20,531                       | 36                        | The Cancer Genome Atlas - Cholangiocarcinoma                                                                 |
| TCGA_LUAD    | 20,531                       | 517                       | The Cancer Genome Atlas - Lung adenocarcinoma                                                                |
| TCGA_DLBC    | 20,531                       | 28                        | The Cancer Genome Atlas - Lymphoid Neoplasm Diffuse Large B-cell Lymphoma                                    |
| TCGA_UCEC    | 20,531                       | 177                       | The Cancer Genome Atlas - Uterine Corpus Endometrial Carcinoma                                               |
| TCGA_MESO    | 20,531                       | 86                        | The Cancer Genome Atlas - Mesothelioma                                                                       |
| TCGA_COADRE/ | 20,531                       | 382                       | The Cancer Genome Atlas - Colorectal adenocarcinoma                                                          |
| TCGA_OV      | 20,531                       | 265                       | The Cancer Genome Atlas - Ovarian serous cystadenocarcinoma                                                  |

|           |        |     |                                                                 |
|-----------|--------|-----|-----------------------------------------------------------------|
| TCGA_GBM  | 20,531 | 166 | The Cancer Genome Atlas - Glioblastoma multiforme               |
| TCGA_PRAD | 20,531 | 498 | The Cancer Genome Atlas - Prostate adenocarcinoma               |
| TCGA_KIRP | 20,531 | 291 | The Cancer Genome Atlas - Kidney renal papillary cell carcinoma |
| TCGA_LIHC | 20,531 | 373 | The Cancer Genome Atlas - Liver hepatocellular carcinoma        |
| TCGA_LAML | 20,531 | 173 | The Cancer Genome Atlas - Acute Myeloid Leukemia                |
| TCGA_LGG  | 20,531 | 530 | The Cancer Genome Atlas - Brain Lower Grade Glioma              |
| TCGA_COAD | 20,531 | 287 | The Cancer Genome Atlas - Colon adenocarcinoma                  |

Table S2 Related to Figure 4: Matrix factorization statistics

| Dataset       | SVD fit | SVD modules | avg SVD module size | avg active SVD modules |
|---------------|---------|-------------|---------------------|------------------------|
| ImmGen        | 99.5%   | 65          | 8,051.0             | 18.1                   |
| Thomsen_2016  | 99.5%   | 37          | 5,498.9             | 10.9                   |
| GTEX          | 99.5%   | 740         | 5,335.9             | 202.3                  |
| TCGA_GBMLGG   | 99.5%   | 502         | 7,313.8             | 193.2                  |
| TCGA_LUAD     | 99.5%   | 438         | 7,418.6             | 201.9                  |
| TCGA_READ     | 99.5%   | 86          | 7,449.5             | 42.4                   |
| TCGA_MESO     | 99.5%   | 78          | 7,447.4             | 38.7                   |
| TCGA_BLCA     | 99.5%   | 355         | 7,418.7             | 168.9                  |
| TCGA_KIPAN    | 99.5%   | 607         | 7,309.7             | 227.5                  |
| TCGA_PCPG     | 99.5%   | 158         | 7,404.0             | 70.8                   |
| TCGA_PAAD     | 99.5%   | 148         | 7,329.7             | 63.7                   |
| TCGA_CHOL     | 99.3%   | 33          | 7,487.5             | 17.0                   |
| TCGA_UCEC     | 99.5%   | 156         | 7,401.0             | 73.4                   |
| TCGA_COADREAD | 99.5%   | 325         | 7,427.7             | 145.8                  |
| TCGA_LIHC     | 99.5%   | 317         | 7,393.9             | 144.6                  |
| TCGA_ACC      | 99.5%   | 72          | 7,471.1             | 35.7                   |
| TCGA_UVM      | 99.5%   | 68          | 7,340.0             | 29.5                   |
| TCGA_LAML     | 99.5%   | 145         | 7,382.7             | 61.2                   |
| TCGA_GBM      | 99.5%   | 143         | 7,373.8             | 64.2                   |
| TCGA_BRCA     | 99.5%   | 861         | 7,384.0             | 387.9                  |
| TCGA_TGCT     | 99.5%   | 131         | 7,350.9             | 55.6                   |
| TCGA_CESC     | 99.5%   | 267         | 7,426.5             | 126.8                  |
| TCGA_KICH     | 99.4%   | 57          | 7,373.2             | 25.7                   |
| Grun_2015     | 99.5%   | 145         | 7,539.7             | 58.9                   |
| TCGA_DLBC     | 99.4%   | 26          | 7,478.1             | 13.5                   |
| TCGA_COAD     | 99.5%   | 248         | 7,431.4             | 112.9                  |
| TCGA_KIRP     | 99.5%   | 225         | 7,379.3             | 91.9                   |
| TCGA_OV       | 99.5%   | 241         | 7,468.8             | 122.8                  |
| TCGA_THYM     | 99.5%   | 89          | 7,162.1             | 32.1                   |
| TCGA_UCS      | 99.5%   | 54          | 7,490.8             | 28.6                   |
| Tasic_2016    | 98.4%   | 1,000       | 7,621.5             | 489.8                  |
| TCGA_SARC     | 99.5%   | 231         | 7,415.2             | 110.5                  |
| TCGA_KIRC     | 99.5%   | 397         | 7,320.3             | 157.3                  |
| TCGA_LGG      | 99.5%   | 394         | 7,320.2             | 153.7                  |
| TCGA_HNSC     | 99.5%   | 434         | 7,393.1             | 196.2                  |
| TCGA_THCA     | 99.5%   | 378         | 7,285.8             | 143.0                  |
| TCGA_LUSC     | 99.5%   | 431         | 7,434.9             | 205.5                  |
| TCGA_PRAD     | 99.5%   | 391         | 7,314.9             | 159.7                  |
| TCGA          | 94.4%   | 1,000       | 10,057.0            | 447.7                  |
| Zeisel_2015   | 93.8%   | 1,000       | 8,781.5             | 539.5                  |

| Dataset       | sprse NMF fit | sNMF modules | avg sNMF module size | avg active sNMF modules |
|---------------|---------------|--------------|----------------------|-------------------------|
| ImmGen        | 99.0%         | 93           | 7,714.5              | 3.8                     |
| Thomsen_2016  | 99.1%         | 37           | 2,348.8              | 3.8                     |
| GTEX          | 81.5%         | 1,082        | 3,933.7              | 5.8                     |
| TCGA_GBMLGG   | 93.0%         | 502          | 7,040.7              | 6.8                     |
| TCGA_LUAD     | 90.2%         | 438          | 6,746.5              | 6.1                     |
| TCGA_READ     | 97.6%         | 86           | 7,061.2              | 3.4                     |
| TCGA_MESO     | 98.2%         | 78           | 6,921.9              | 3.8                     |
| TCGA_BLCA     | 91.7%         | 355          | 6,769.2              | 5.7                     |
| TCGA_KIPAN    | 50.2%         | 607          | 8,225.7              | 2.2                     |
| TCGA_PCPG     | 92.7%         | 158          | 7,293.7              | 3.6                     |
| TCGA_PAAD     | 88.0%         | 148          | 7,477.9              | 3.3                     |
| TCGA_CHOL     | 97.9%         | 33           | 6,672.4              | 3.5                     |
| TCGA_UCEC     | 96.8%         | 156          | 7,000.8              | 4.4                     |
| TCGA_COADREAD | 91.6%         | 325          | 6,946.0              | 5.6                     |
| TCGA_LIHC     | 95.0%         | 317          | 6,669.8              | 6.4                     |
| TCGA_ACC      | 96.8%         | 72           | 6,731.9              | 3.6                     |
| TCGA_UVM      | 98.4%         | 68           | 7,224.0              | 3.4                     |
| TCGA_LAML     | 90.9%         | 145          | 7,126.3              | 3.5                     |
| TCGA_GBM      | 94.2%         | 143          | 6,954.0              | 4.3                     |
| TCGA_BRCA     | 91.7%         | 861          | 6,948.0              | 8.0                     |
| TCGA_TGCT     | 97.6%         | 131          | 7,028.3              | 4.1                     |
| TCGA_CESC     | 89.9%         | 267          | 7,048.5              | 5.0                     |
| TCGA_KICH     | 98.9%         | 57           | 7,286.8              | 3.4                     |
| Grun_2015     | 94.6%         | 145          | 2,986.2              | 8.4                     |
| TCGA_DLBC     | 99.1%         | 26           | 7,064.9              | 2.9                     |
| TCGA_COAD     | 90.9%         | 248          | 6,922.3              | 4.7                     |
| TCGA_KIRP     | 95.1%         | 225          | 7,020.7              | 5.9                     |
| TCGA_OV       | 80.6%         | 241          | 7,207.3              | 3.0                     |
| TCGA_THYM     | 98.0%         | 89           | 7,216.0              | 4.5                     |
| TCGA_UCS      | 98.3%         | 54           | 6,969.3              | 3.0                     |
| Tasic_2016    | 50.4%         | 1,000        | 2,265.8              | 5.7                     |
| TCGA_SARC     | 85.4%         | 231          | 7,020.0              | 3.8                     |
| TCGA_KIRC     | 93.1%         | 397          | 7,117.3              | 6.7                     |
| TCGA_LGG      | 94.0%         | 394          | 7,013.5              | 6.6                     |
| TCGA_HNSC     | 45.6%         | 434          | 8,154.7              | 1.6                     |
| TCGA_THCA     | 93.9%         | 378          | 7,007.5              | 6.5                     |
| TCGA_LUSC     | 90.5%         | 431          | 6,888.8              | 5.7                     |
| TCGA_PRAD     | 94.0%         | 391          | 6,981.7              | 6.5                     |
| TCGA          | 85.8%         | 1,100        | 7,021.9              | 14.8                    |
| Zeisel_2015   | 33.5%         | 1,100        | 2,564.4              | 9.9                     |

| Dataset       | SMAF fit | SMAF modules | avg SMAF module size | avg active SMAF modules |
|---------------|----------|--------------|----------------------|-------------------------|
| ImmGen        | 98.4%    | 152          | 654.6                | 6.6                     |
| Thomsen_2016  | 98.3%    | 48           | 605.4                | 6.3                     |
| GTEX          | 97.9%    | 863          | 1,321.8              | 8.1                     |
| TCGA_GBMLGG   | 95.3%    | 280          | 5,162.4              | 8.2                     |
| TCGA_LUAD     | 95.1%    | 349          | 4,274.5              | 7.9                     |
| TCGA_READ     | 94.7%    | 106          | 2,092.1              | 7.5                     |
| TCGA_MESO     | 94.3%    | 99           | 1,697.5              | 6.8                     |
| TCGA_BLCA     | 94.2%    | 286          | 3,394.2              | 7.8                     |
| TCGA_KIPAN    | 94.2%    | 314          | 3,399.2              | 8.2                     |
| TCGA_PCPG     | 94.1%    | 167          | 1,717.6              | 7.3                     |
| TCGA_PAAD     | 94.0%    | 152          | 1,430.8              | 7.1                     |
| TCGA_CHOL     | 94.0%    | 43           | 1,910.5              | 6.1                     |
| TCGA_UCEC     | 93.9%    | 158          | 1,997.8              | 7.2                     |
| TCGA_COADREAD | 93.9%    | 269          | 2,882.7              | 8.2                     |
| TCGA_LIHC     | 93.8%    | 265          | 2,541.5              | 7.8                     |
| TCGA_ACC      | 93.8%    | 91           | 1,797.9              | 7.2                     |
| TCGA_UVM      | 93.6%    | 78           | 1,320.6              | 6.7                     |
| TCGA_LAML     | 93.5%    | 134          | 1,694.9              | 7.8                     |
| TCGA_GBM      | 93.5%    | 159          | 1,354.0              | 7.5                     |
| TCGA_BRCA     | 93.4%    | 485          | 5,910.7              | 8.2                     |
| TCGA_TGCT     | 93.0%    | 129          | 1,241.9              | 6.8                     |
| TCGA_CESC     | 92.8%    | 255          | 1,741.9              | 7.6                     |
| TCGA_KICH     | 92.4%    | 69           | 1,267.5              | 6.4                     |
| Grun_2015     | 92.4%    | 116          | 2,446.9              | 7.6                     |
| TCGA_DLBC     | 92.3%    | 31           | 1,840.1              | 6.5                     |
| TCGA_COAD     | 92.2%    | 231          | 1,683.5              | 7.9                     |
| TCGA_KIRP     | 92.2%    | 204          | 1,308.3              | 7.8                     |
| TCGA_OV       | 92.1%    | 253          | 1,634.4              | 7.4                     |
| TCGA_THYM     | 91.8%    | 93           | 726.2                | 6.1                     |
| TCGA_UCS      | 91.8%    | 64           | 1,615.9              | 6.4                     |
| Tasic_2016    | 91.7%    | 560          | 2,394.9              | 7.7                     |
| TCGA_SARC     | 91.7%    | 214          | 1,324.9              | 7.1                     |
| TCGA_KIRC     | 91.3%    | 288          | 1,139.8              | 7.8                     |
| TCGA_LGG      | 91.2%    | 254          | 1,160.1              | 7.6                     |
| TCGA_HNSC     | 91.1%    | 342          | 1,558.4              | 7.9                     |
| TCGA_THCA     | 90.9%    | 271          | 889.5                | 8.0                     |
| TCGA_LUSC     | 90.9%    | 339          | 1,758.5              | 7.9                     |
| TCGA_PRAD     | 90.7%    | 256          | 1,275.3              | 7.6                     |
| TCGA          | 87.7%    | 883          | 6,922.5              | 8.5                     |
| Zeisel_2015   | 84.2%    | 574          | 4,355.5              | 8.1                     |

Table S3 Related to Figure 1: Correlation of RNA-Seq and composite qPCR

| Parameter                                    | Individual Probe Test<br>(Concentration = 25nM) | Individual Probe Test<br>(Concentration = 2.5nM) | Individual Probe Test<br>(Concentration = 250pM) | Individual Probe Test<br>(Concentration = 25pM) |
|----------------------------------------------|-------------------------------------------------|--------------------------------------------------|--------------------------------------------------|-------------------------------------------------|
| Pearson r                                    | <b>0.1485</b>                                   | <b>0.1874</b>                                    | <b>0.4963</b>                                    | <b>0.623</b>                                    |
| 95% confidence interval                      | -0.2306 to 0.4885                               | -0.1924 to 0.5184                                | 0.1586 to 0.7301                                 | 0.3324 to 0.8056                                |
| P value (two-tailed)                         | 0.4419                                          | 0.3303                                           | 0.0062                                           | 0.0003                                          |
| P value summary                              | ns                                              | ns                                               | **                                               | ***                                             |
| Is the correlation significant? (alpha=0.05) | No                                              | No                                               | Yes                                              | Yes                                             |
| R square                                     | 0.02206                                         | 0.03512                                          | 0.2463                                           | 0.3882                                          |
| Spearman r                                   | 0.1338                                          | 0.3101                                           | 0.5286                                           | 0.6433                                          |
| 95% confidence interval                      | -0.2554 to 0.4858                               | -0.07501 to 0.6148                               | 0.1901 to 0.7548                                 | 0.3523 to 0.8209                                |
| P value (two-tailed)                         | 0.4888                                          | 0.1016                                           | 0.0032                                           | 0.0002                                          |
| P value summary                              | ns                                              | ns                                               | **                                               | ***                                             |
| Exact or approximate P value?                | Gaussian Approximation                          | Gaussian Approximation                           | Gaussian Approximation                           | Gaussian Approximation                          |
| Is the correlation significant? (alpha=0.05) | No                                              | No                                               | Yes                                              | Yes                                             |

| Parameter                                    | Individual Gene Test,<br>Four Probes Per Gene<br>(Concentration = 25nM) | Individual Gene Test,<br>Four Probes Per Gene<br>(Concentration = 2.5nM) | Individual Gene Test,<br>Four Probes Per Gene<br>(Concentration = 250pM) | Individual Gene Test,<br>Four Probes Per Gene<br>(Concentration = 25pM) |
|----------------------------------------------|-------------------------------------------------------------------------|--------------------------------------------------------------------------|--------------------------------------------------------------------------|-------------------------------------------------------------------------|
| Pearson r                                    | <b>0.6013</b>                                                           | <b>0.3955</b>                                                            | <b>0.8834</b>                                                            | <b>0.8646</b>                                                           |
| 95% confidence interval                      | -0.1796 to 0.9173                                                       | -0.4288 to 0.8604                                                        | 0.4732 to 0.9788                                                         | 0.4091 to 0.9752                                                        |
| P value (two-tailed)                         | 0.1149                                                                  | 0.3321                                                                   | 0.0036                                                                   | 0.0056                                                                  |
| P value summary                              | ns                                                                      | ns                                                                       | **                                                                       | **                                                                      |
| Is the correlation significant? (alpha=0.05) | No                                                                      | No                                                                       | Yes                                                                      | Yes                                                                     |
| R square                                     | 0.3616                                                                  | 0.1564                                                                   | 0.7804                                                                   | 0.7475                                                                  |
| Spearman r                                   | 0.5714                                                                  | 0.4286                                                                   | 0.6429                                                                   | 0.7619                                                                  |
| P value (two-tailed)                         | 0.1511                                                                  | 0.2992                                                                   | 0.0962                                                                   | 0.0368                                                                  |
| P value summary                              | ns                                                                      | ns                                                                       | ns                                                                       | *                                                                       |
| Exact or approximate P value?                | Exact                                                                   | Exact                                                                    | Exact                                                                    | Exact                                                                   |
| Is the correlation significant? (alpha=0.05) | No                                                                      | No                                                                       | No                                                                       | Yes                                                                     |

| Parameter | Expected<br>vs.<br>Experimental(Rep1) | Expected<br>vs.<br>Experimental(Rep2) |
|-----------|---------------------------------------|---------------------------------------|
|           |                                       |                                       |

|                                              |                        |                        |
|----------------------------------------------|------------------------|------------------------|
| Pearson r                                    | <b>0.8518</b>          | <b>0.9014</b>          |
| 95% confidence interval                      | 0.6483 to 0.9417       | 0.7571 to 0.9618       |
| P value (two-tailed)                         | < 0.0001               | < 0.0001               |
| P value summary                              | ***                    | ***                    |
| Is the correlation significant? (alpha=0.05) | Yes                    | Yes                    |
| R square                                     | 0.7255                 | 0.8124                 |
| Spearman r                                   | 0.6596                 | 0.6789                 |
| 95% confidence interval                      | 0.2799 to 0.8609       | 0.3118 to 0.8697       |
| P value (two-tailed)                         | 0.0021                 | 0.0014                 |
| P value summary                              | **                     | **                     |
| Exact or approximate P value?                | Gaussian Approximation | Gaussian Approximation |
| Is the correlation significant? (alpha=0.05) | Yes                    | Yes                    |

Table S4 Related to Figure 1: Weights in random composite measurements

| Gene ID | Gene Symbol | Measurement 1 | Measurement 2 | Measurement 3 | Measurement 4 | Measurement 5 | Measurement 6 |
|---------|-------------|---------------|---------------|---------------|---------------|---------------|---------------|
| 1       | ACTB        | 1             | 0.01          | 0.01          | 0.01          | 0.001         | 0.001         |
| 2       | EMR1        | 1             | 0.001         | 0.1           | 0.1           | 1             | 0.01          |
| 3       | GCLC        | 0.1           | 0.1           | 0.001         | 0.001         | 0.1           | 0.01          |
| 4       | LARS        | 0.1           | 0.001         | 0.1           | 0.001         | 0.1           | 0.1           |
| 5       | MYB         | 0.01          | 0.001         | 0.001         | 0.01          | 0.001         | 1             |
| 6       | PDLIM5      | 0.01          | 1             | 1             | 0.1           | 0.001         | 0.1           |
| 7       | SNAP23      | 0.1           | 0.1           | 0.1           | 1             | 0.01          | 0.01          |
| 8       | TFRC        | 0.01          | 0.1           | 0.1           | 0.01          | 1             | 0.001         |
| 9       | ALOX5       | 0.001         | 0.001         | 0.01          | 0.001         | 0.01          | 1             |
| 10      | FOXK2       | 0.001         | 0.001         | 1             | 0.01          | 0.01          | 0.1           |
| 11      | HSPA13      | 1             | 0.01          | 1             | 1             | 1             | 0.1           |
| 12      | MCM4        | 0.001         | 0.1           | 0.001         | 0.1           | 0.01          | 0.01          |
| 13      | MYC         | 0.001         | 0.01          | 0.01          | 0.1           | 0.1           | 1             |
| 14      | PFDN5       | 0.01          | 1             | 0.01          | 0.1           | 0.001         | 0.1           |
| 15      | SRM         | 0.01          | 0.01          | 1             | 0.01          | 1             | 0.1           |
| 16      | XRCC6       | 1             | 1             | 0.01          | 1             | 1             | 0.01          |
| 17      | CTSS        | 0.001         | 0.001         | 0.1           | 1             | 0.001         | 0.001         |
| 18      | GAS7        | 1             | 0.01          | 0.001         | 1             | 0.1           | 0.01          |
| 19      | HSPA9       | 0.1           | 1             | 1             | 0.001         | 0.01          | 1             |
| 20      | MDM1        | 0.1           | 0.1           | 0.01          | 0.001         | 0.001         | 0.001         |
| 21      | OAZ1        | 0.01          | 0.01          | 0.1           | 0.001         | 0.1           | 0.001         |
| 22      | PLEK        | 0.1           | 0.1           | 0.001         | 0.01          | 0.1           | 0.001         |
| 23      | STAU1       | 0.001         | 1             | 0.001         | 0.1           | 0.01          | 1             |

\*Values represent the relative abundance of probes for each gene within a measurement



| Measurement 7 | Measurement 8 | Measurement 9 | Measurement 10 | Measurement 11 | Measurement 12 | Measurement 13 |
|---------------|---------------|---------------|----------------|----------------|----------------|----------------|
| 0.01          | 1             | 0.1           | 1              | 1              | 0.01           | 0.1            |
| 0.001         | 0.01          | 1             | 0.01           | 0.01           | 0.001          | 0.001          |
| 1             | 0.1           | 0.01          | 0.1            | 0.001          | 0.1            | 0.01           |
| 0.01          | 0.001         | 0.01          | 0.01           | 1              | 0.001          | 1              |
| 1             | 0.1           | 0.001         | 0.1            | 0.001          | 0.01           | 0.1            |
| 0.001         | 0.1           | 0.1           | 0.001          | 1              | 1              | 0.001          |
| 0.1           | 0.1           | 0.001         | 0.01           | 0.001          | 1              | 0.001          |
| 0.001         | 1             | 0.001         | 0.1            | 0.001          | 0.1            | 0.01           |
| 0.01          | 0.01          | 0.1           | 0.01           | 0.01           | 0.001          | 0.01           |
| 1             | 0.01          | 1             | 0.1            | 0.01           | 0.01           | 0.1            |
| 0.001         | 0.1           | 1             | 0.1            | 1              | 0.01           | 0.01           |
| 0.1           | 0.01          | 0.001         | 0.001          | 0.1            | 0.1            | 0.1            |
| 0.1           | 1             | 0.01          | 1              | 0.1            | 0.001          | 1              |
| 0.1           | 0.001         | 1             | 1              | 0.01           | 1              | 0.01           |
| 0.01          | 0.01          | 0.001         | 0.001          | 0.1            | 1              | 0.001          |
| 0.001         | 0.001         | 0.1           | 0.001          | 0.001          | 0.01           | 0.1            |
| 0.1           | 0.001         | 0.001         | 0.1            | 0.01           | 0.1            | 0.1            |
| 0.01          | 1             | 0.01          | 0.001          | 1              | 0.01           | 0.001          |
| 1             | 0.01          | 0.1           | 0.01           | 0.1            | 0.1            | 1              |
| 0.01          | 0.001         | 0.01          | 0.001          | 0.1            | 0.1            | 1              |
| 1             | 0.1           | 1             | 1              | 0.01           | 1              | 1              |
| 0.1           | 0.001         | 0.01          | 1              | 0.001          | 0.001          | 0.01           |
| 0.001         | 1             | 0.1           | 0.01           | 0.1            | 0.001          | 0.001          |

| Measurement 14 | Measurement 15 | Measurement 16 | Measurement 17 | Measurement 18 | Measurement 19 | Measurement 20 |
|----------------|----------------|----------------|----------------|----------------|----------------|----------------|
| 0.001          | 1              | 0.001          | 0.001          | 1              | 1              | 0.1            |
| 1              | 0.001          | 0.1            | 0.01           | 0.001          | 0.1            | 1              |
| 1              | 0.01           | 0.001          | 0.1            | 0.001          | 0.1            | 1              |
| 0.001          | 0.01           | 0.1            | 1              | 1              | 1              | 1              |
| 0.1            | 0.01           | 0.01           | 0.001          | 0.01           | 0.001          | 0.01           |
| 0.001          | 0.001          | 0.1            | 0.001          | 0.01           | 0.001          | 0.01           |
| 0.01           | 0.001          | 0.001          | 0.01           | 0.01           | 0.1            | 1              |
| 0.001          | 1              | 0.01           | 0.1            | 0.01           | 0.01           | 0.01           |
| 0.001          | 0.01           | 0.001          | 0.1            | 0.1            | 0.001          | 0.001          |
| 1              | 0.001          | 0.01           | 0.01           | 0.01           | 0.001          | 0.01           |
| 0.1            | 0.1            | 0.1            | 0.01           | 1              | 1              | 0.001          |
| 0.01           | 1              | 0.1            | 0.1            | 1              | 0.001          | 0.01           |
| 0.01           | 0.001          | 1              | 1              | 0.001          | 0.01           | 0.1            |
| 0.01           | 0.01           | 0.001          | 1              | 0.001          | 0.01           | 0.1            |
| 0.1            | 1              | 0.01           | 0.01           | 0.1            | 0.1            | 0.001          |
| 0.1            | 1              | 0.1            | 0.001          | 0.001          | 0.1            | 0.001          |
| 0.01           | 0.001          | 0.01           | 1              | 0.01           | 0.1            | 0.1            |
| 0.001          | 0.01           | 0.001          | 0.1            | 1              | 1              | 0.001          |
| 1              | 0.1            | 1              | 0.1            | 0.1            | 0.001          | 0.1            |
| 1              | 0.1            | 1              | 1              | 0.001          | 0.01           | 0.01           |
| 0.01           | 0.1            | 0.01           | 0.001          | 0.1            | 1              | 0.001          |
| 0.1            | 0.1            | 1              | 0.01           | 0.1            | 0.01           | 1              |
| 0.1            | 0.1            | 1              | 0.001          | 0.1            | 0.01           | 0.1            |
