# Supplementary material
Source: PubMed Central journal article supplement (PMC5726792)

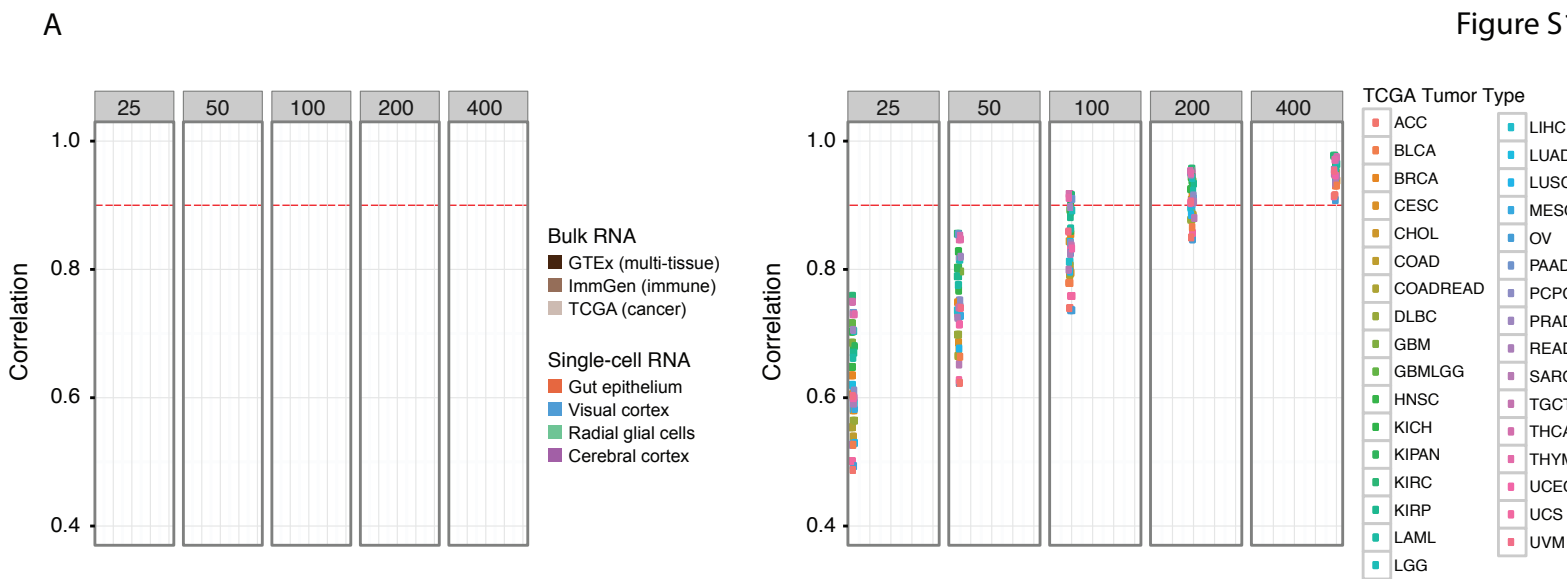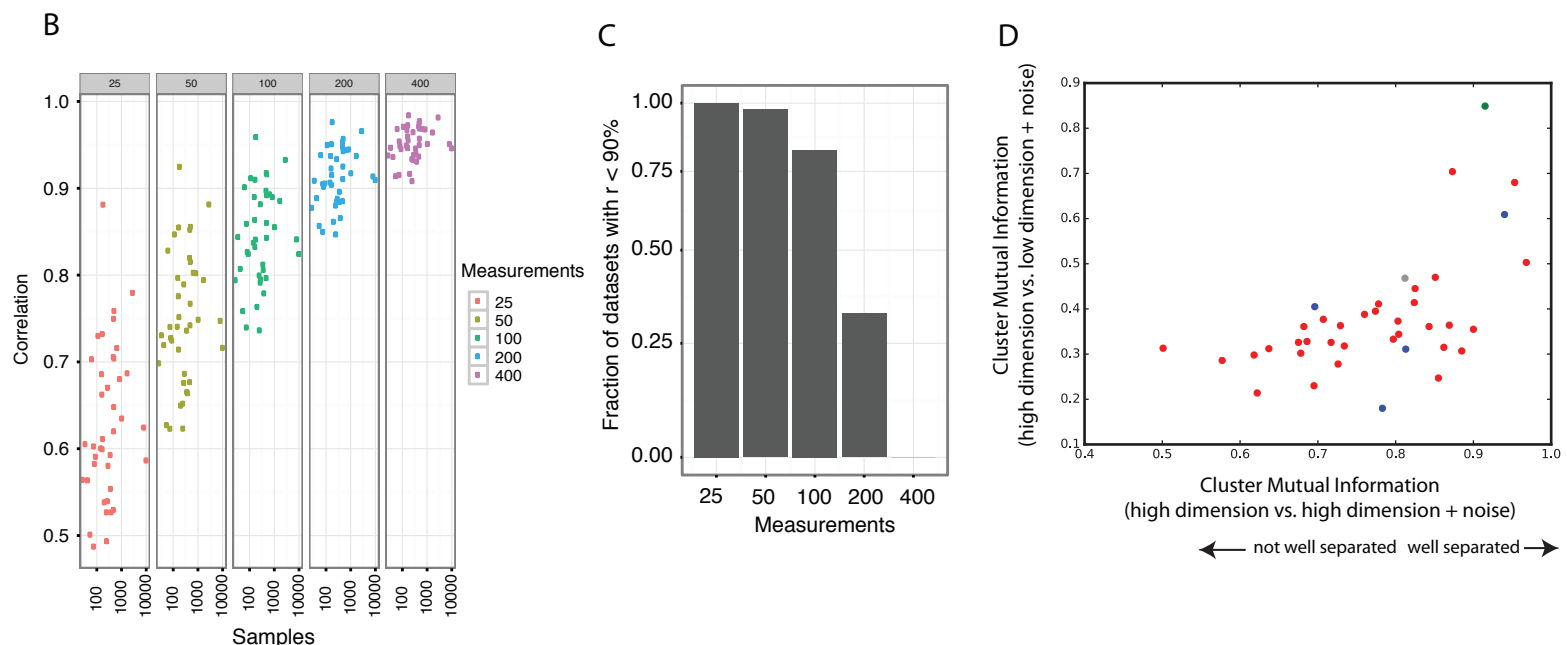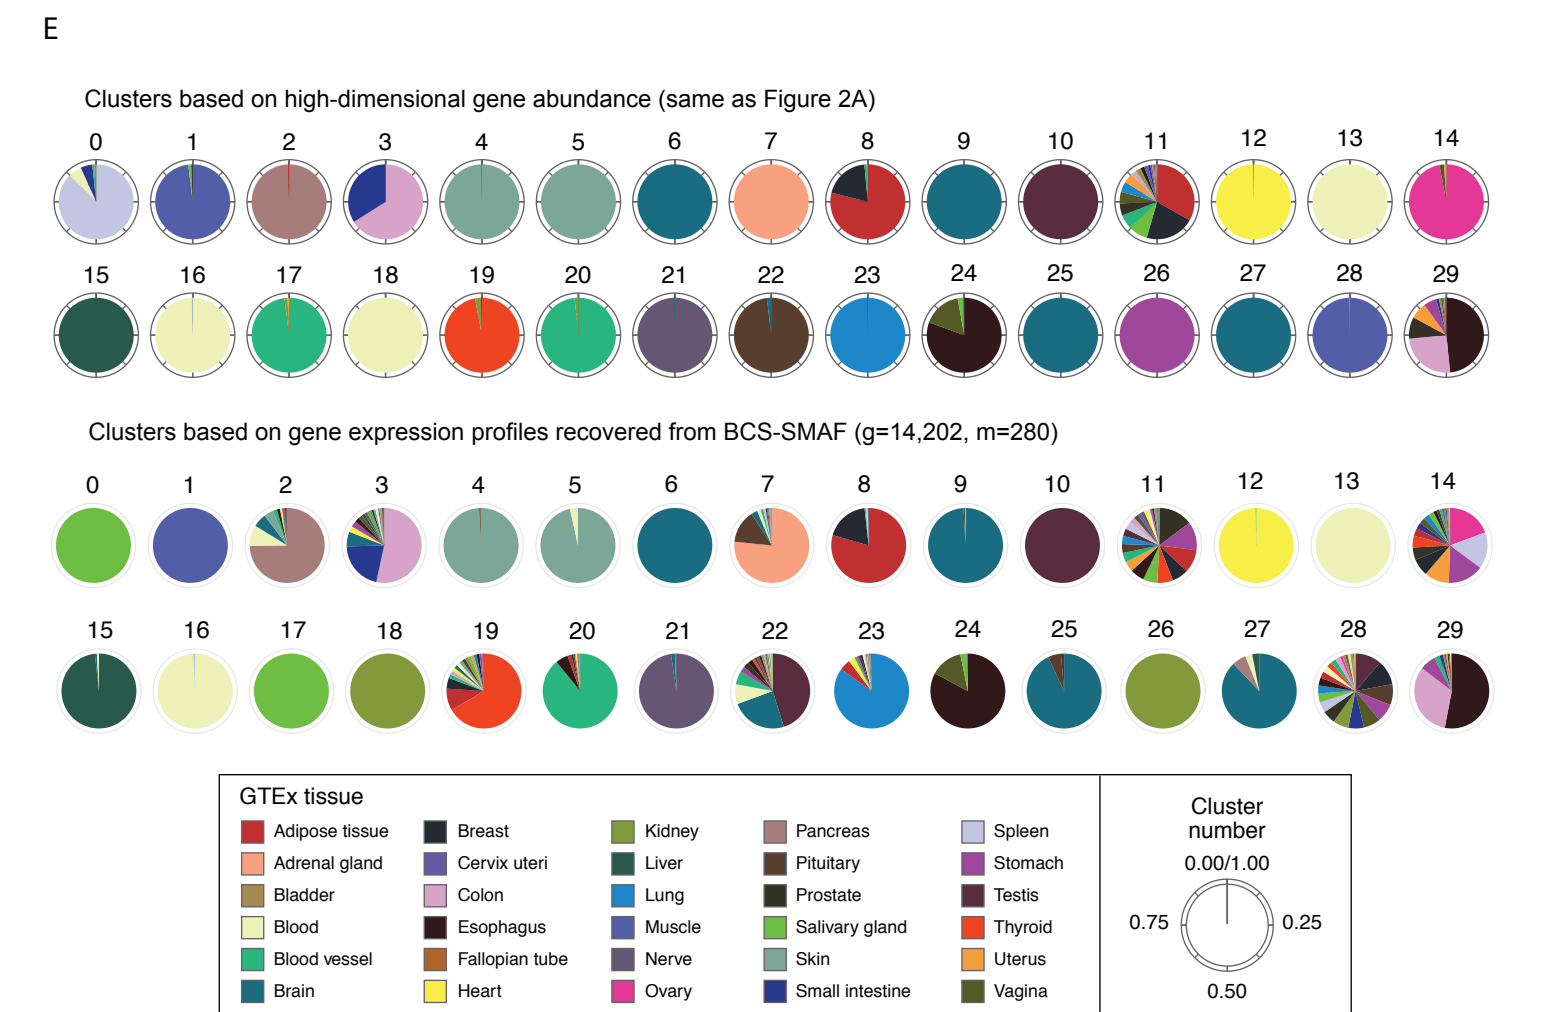

Supplement: NIHMS914453-supplement-2.pdf [file NIHMS914453-supplement-2.pdf]

A

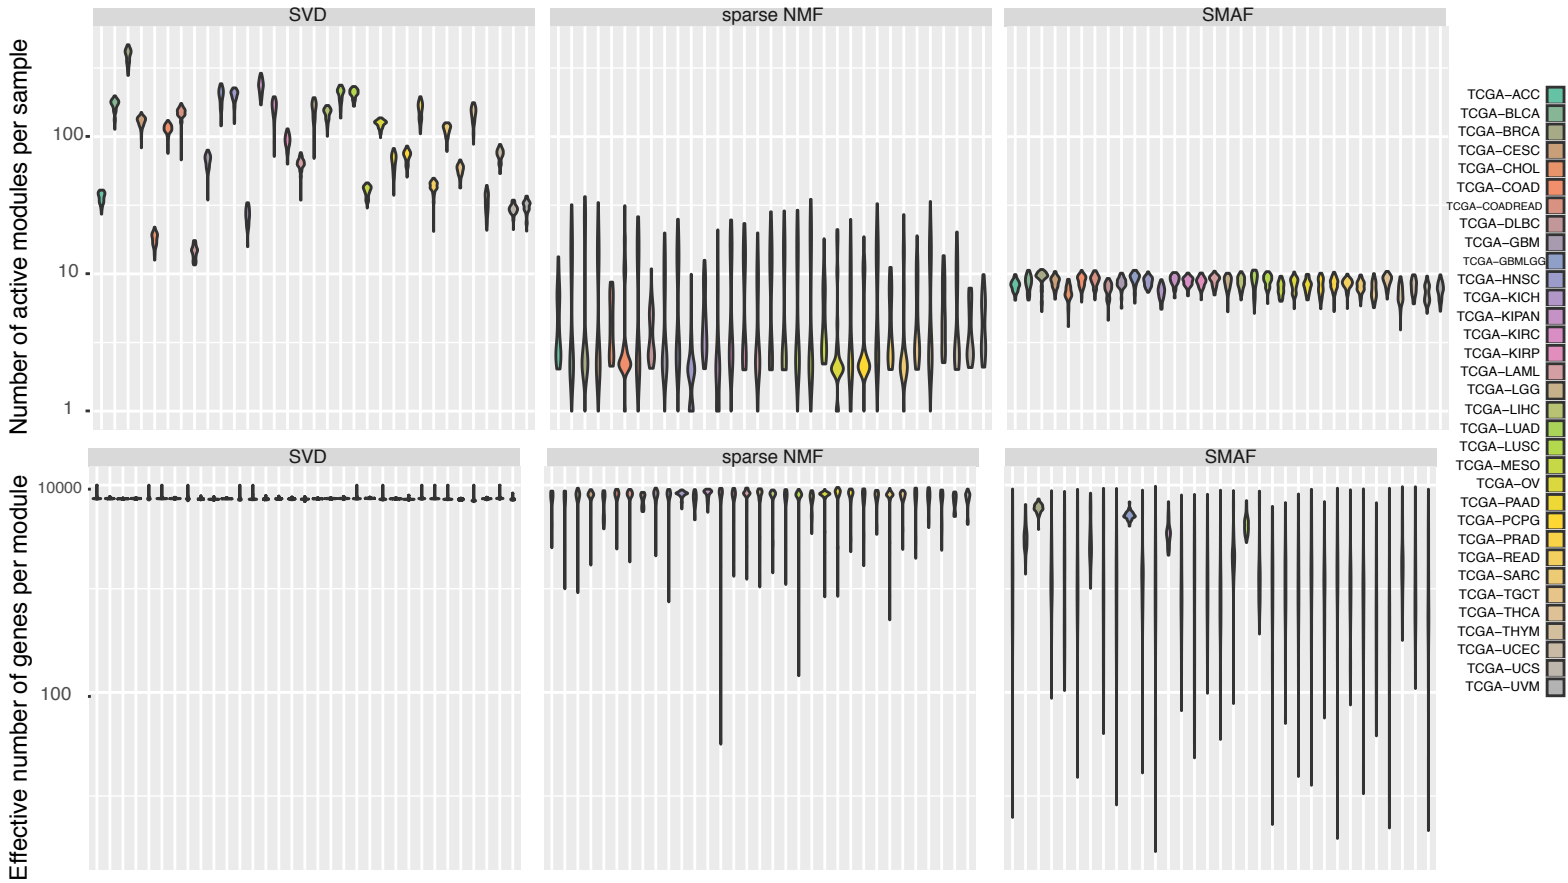

B

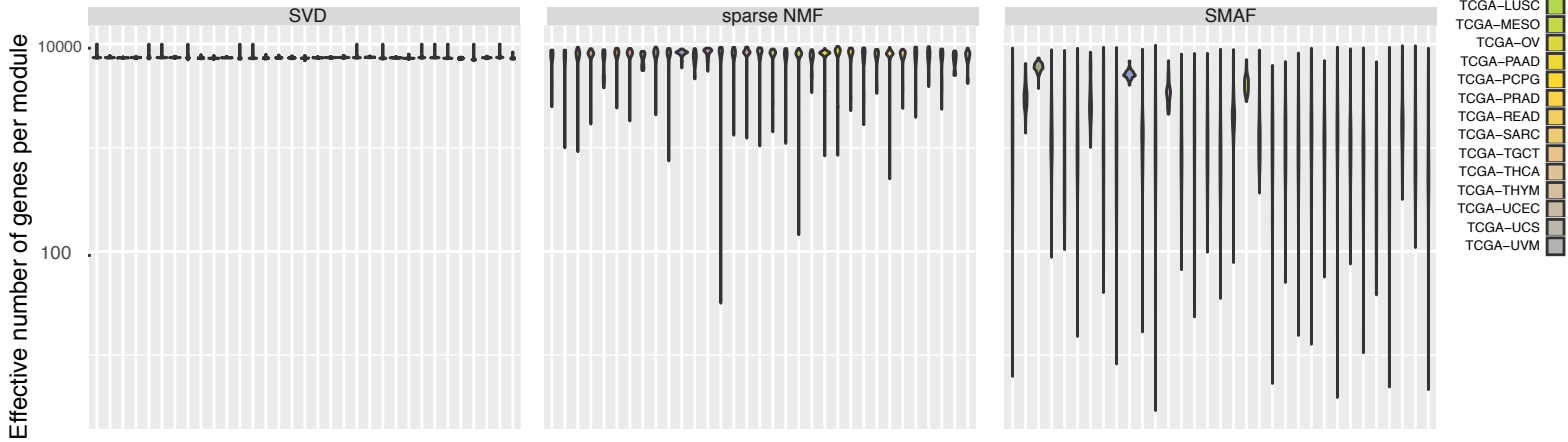

C

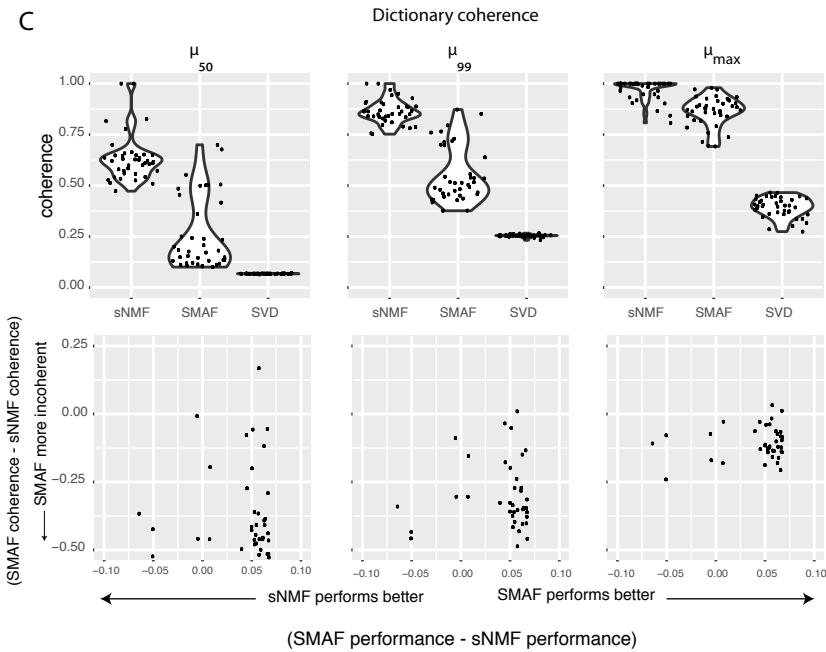

D

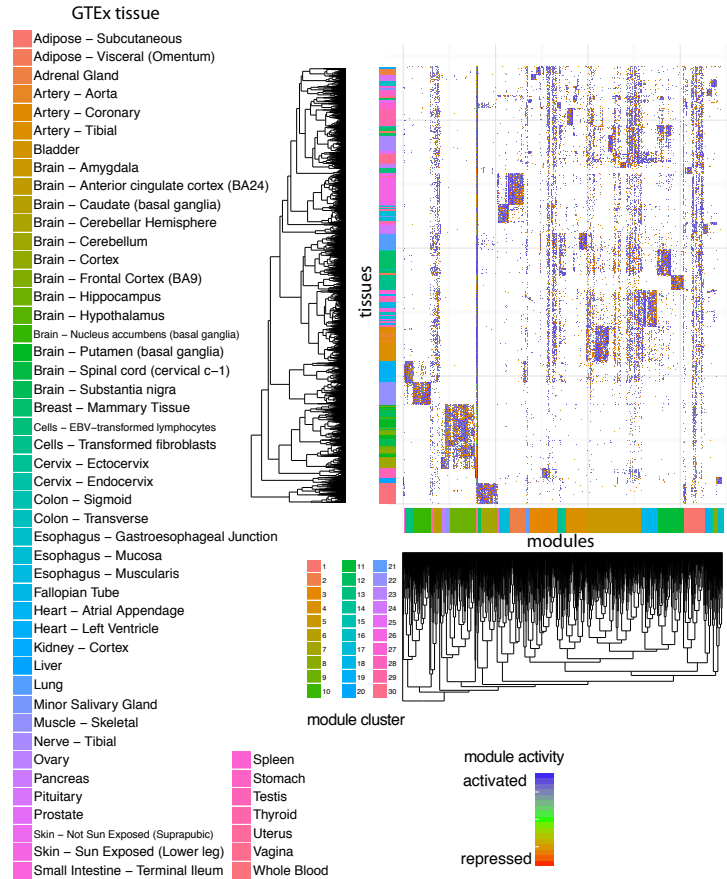

Supplement: NIHMS914453-supplement-3.pdf [file NIHMS914453-supplement-3.pdf]

**A** Gene expression recovery from 25 measurements ( $g=5,000$ ,  $SNR=2$ )

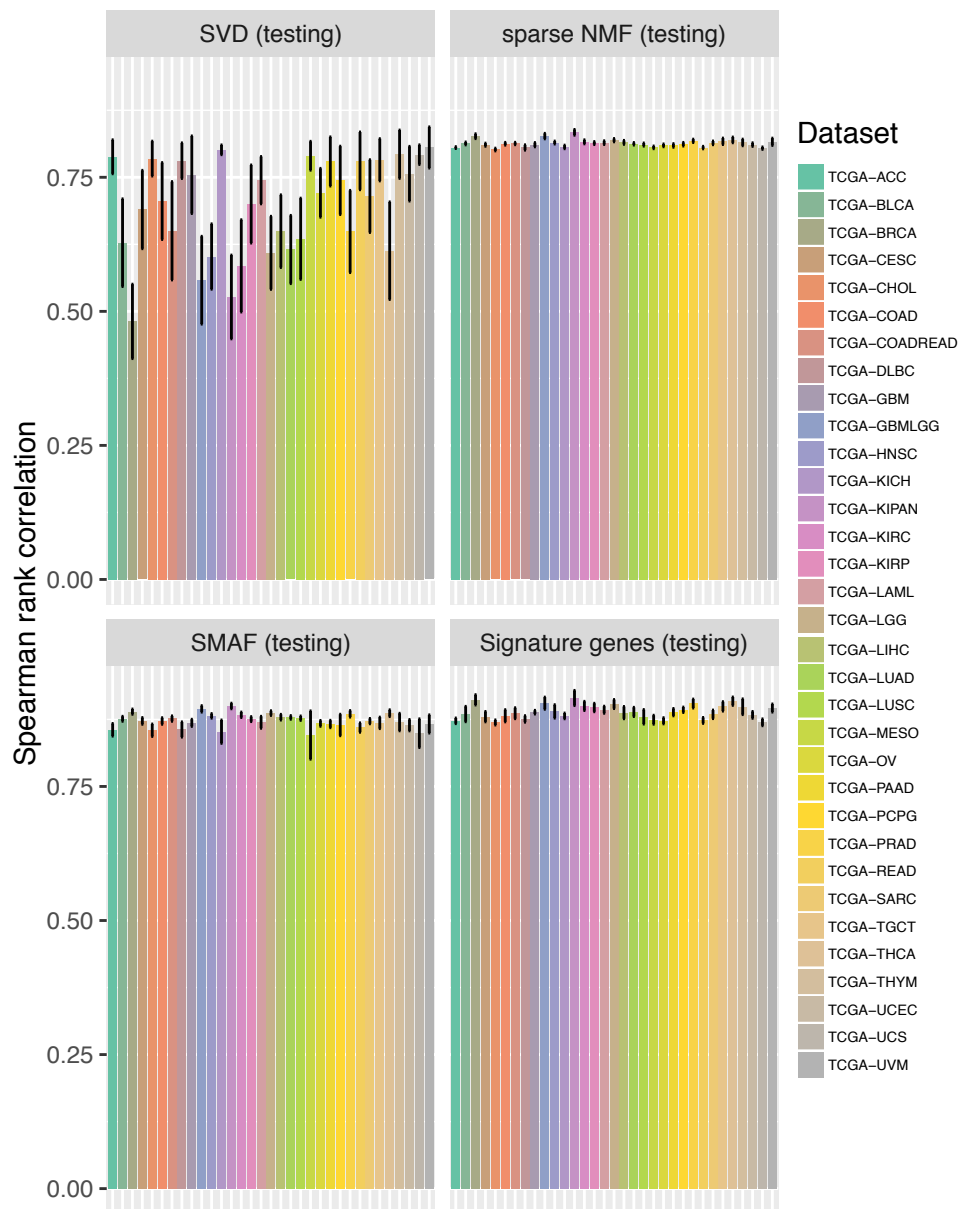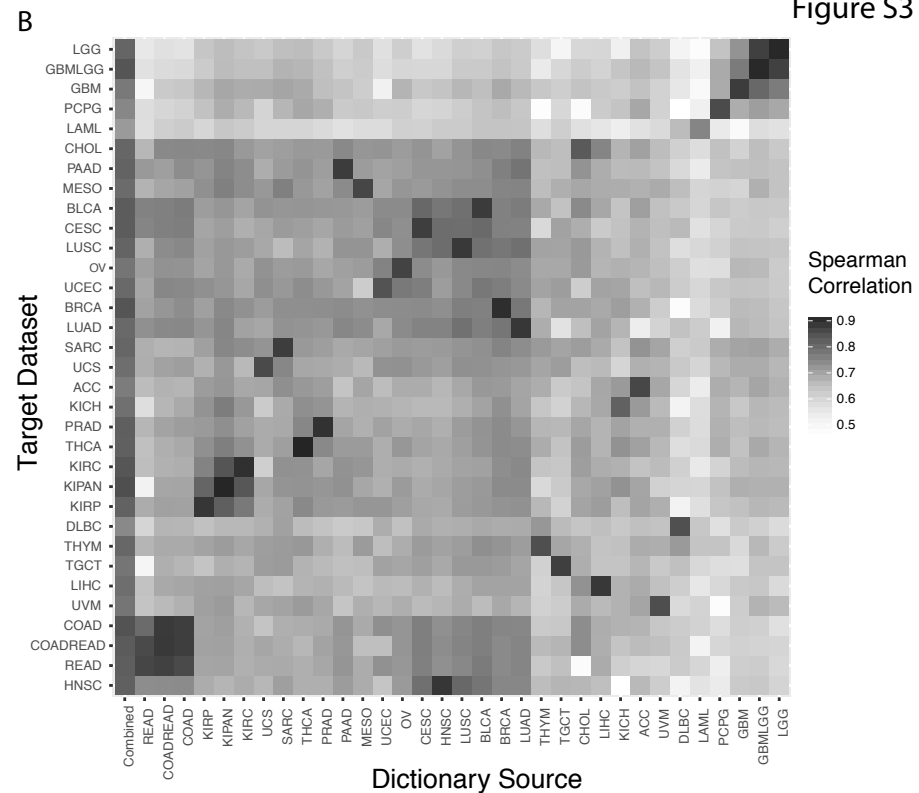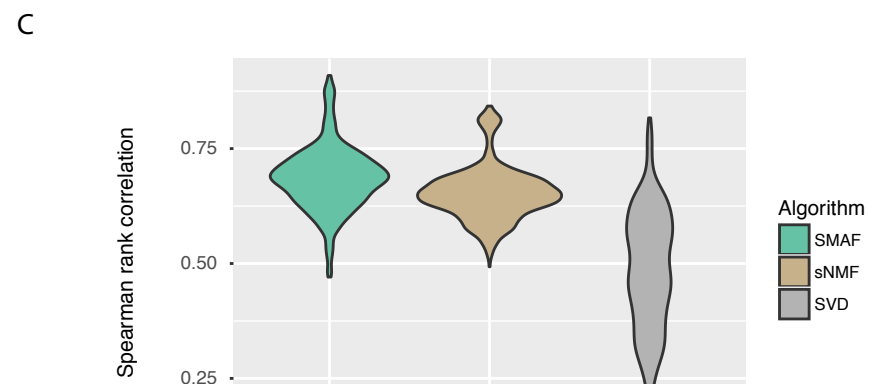

Supplement: NIHMS914453-supplement-4.pdf [file NIHMS914453-supplement-4.pdf]

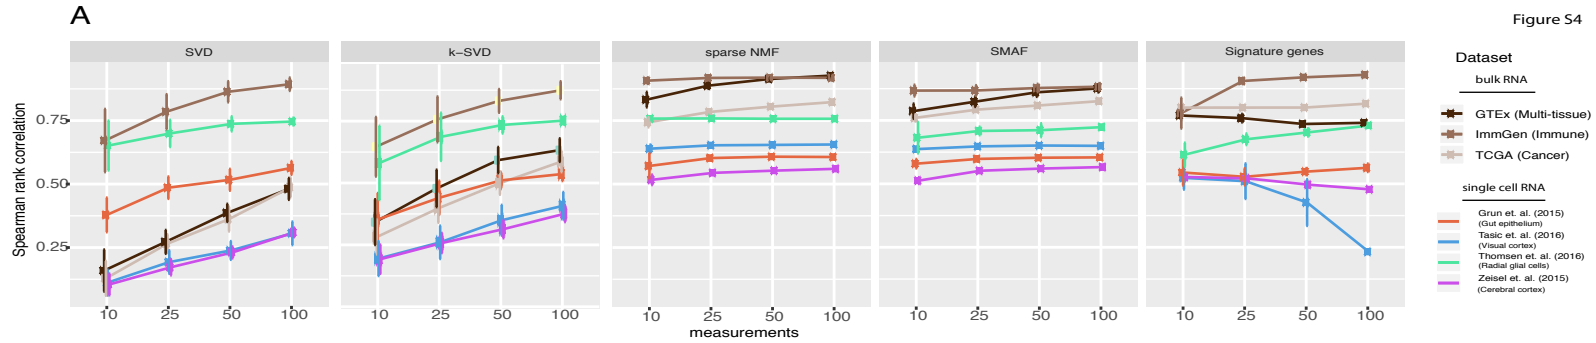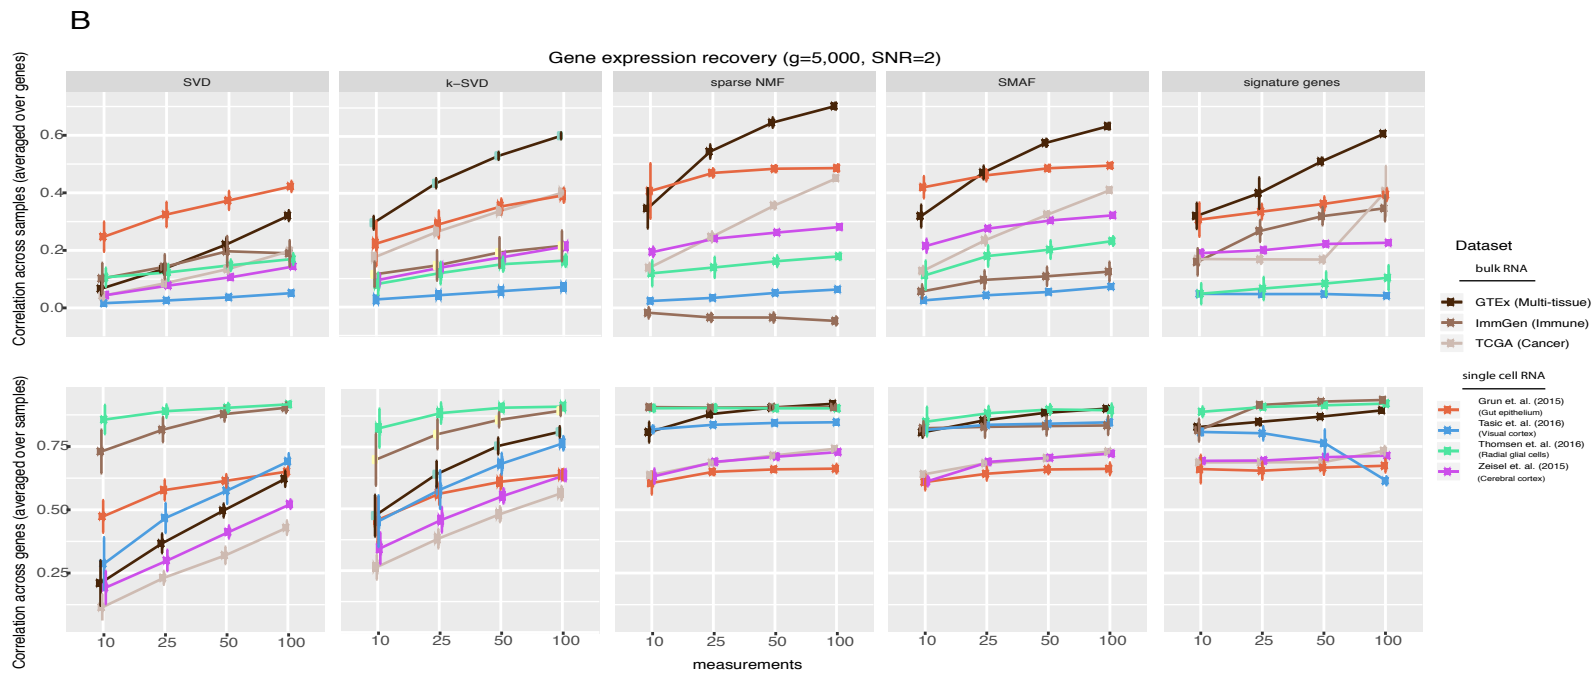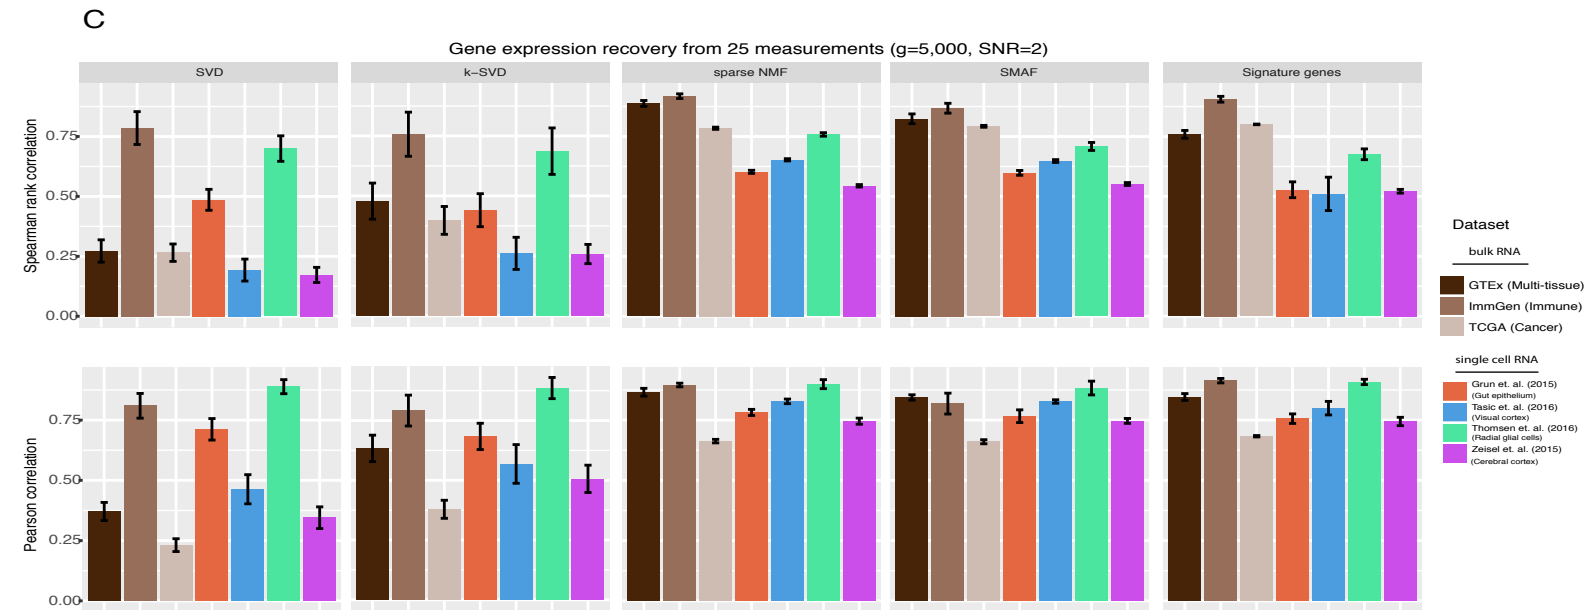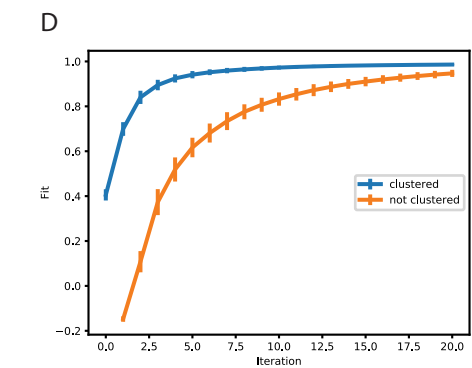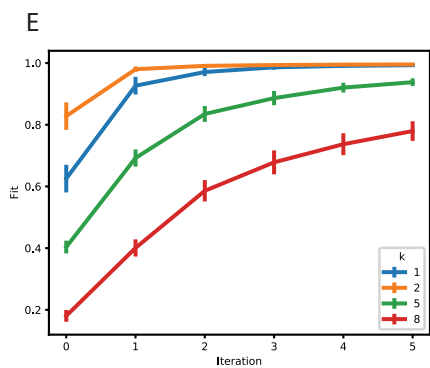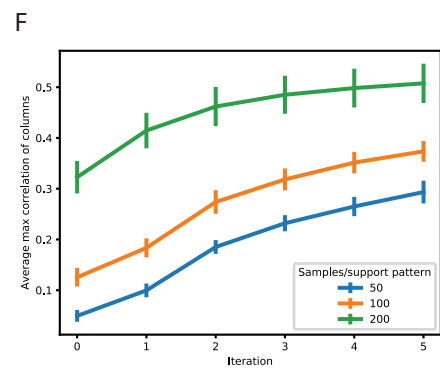

Supplement: NIHMS914453-supplement-5.pdf [file NIHMS914453-supplement-5.pdf]

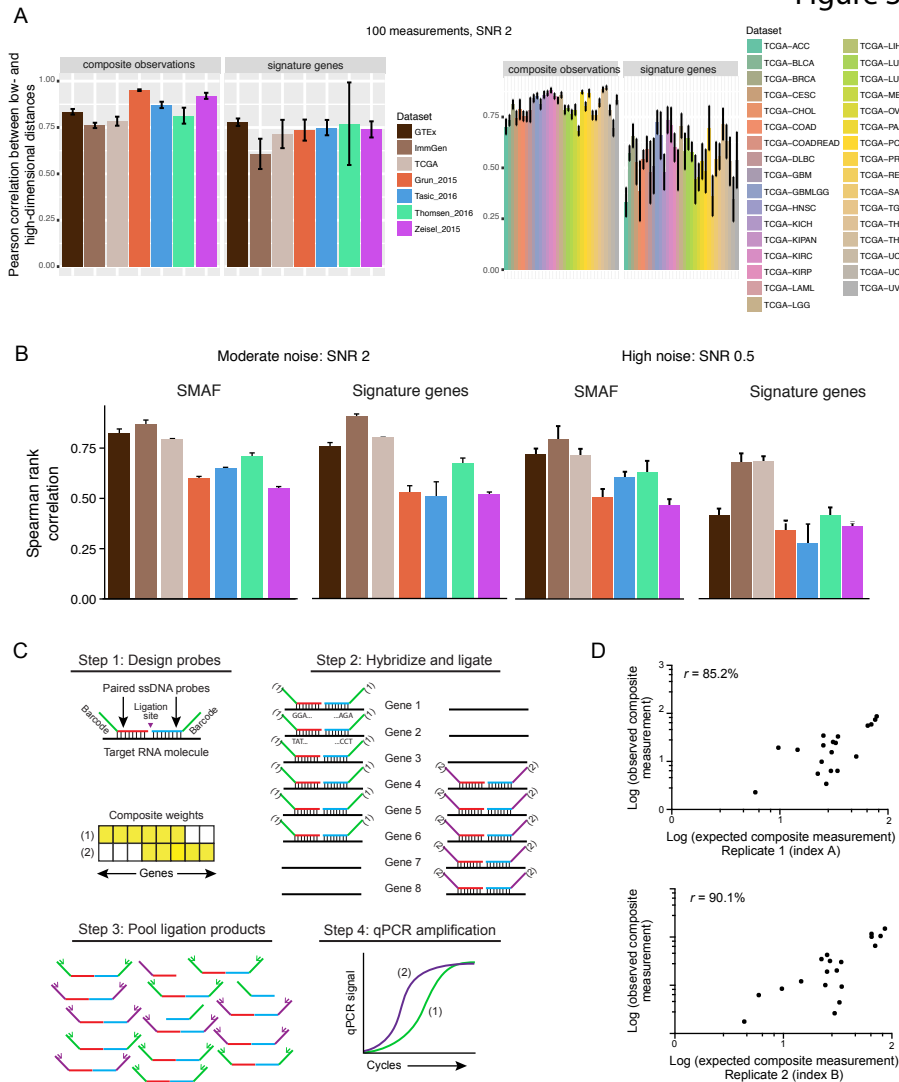

Supplement: NIHMS914453-supplement-6.pdf [file NIHMS914453-supplement-6.pdf]
